# Supplementary material for: Role of Ovarian Proteins Secreted by Toxoneuron nigriceps (Viereck) (Hymenoptera, Braconidae) in the Early Suppression of Host Immune Response
Source: MDPI journal article supplement (doi:10.3390/insects12010033), 2021-01-05
Supplement: s1 [file s1]

**Table S1.** Data obtained counting haemocytes incubated with Pringle solution (control), haemocytes extracted from larvae 24 h after parasitization and OPs derived from 1 or 2 equivalent females. Data are presented as mean  $\pm$  SD ( $n = 3$ ). Statistical analysis was performed with one-way ANOVA (analysis of variance) and Bonferroni *post-hoc* test. Different letters indicate significant differences ( $p$  value  $< 0.0001$ ).

|                               | Control           | Parasitized       | OPs 1 Female Eq.   | OPs 2 Female Eq.  |
|-------------------------------|-------------------|-------------------|--------------------|-------------------|
| <b>Total cell number</b>      | 132.67 $\pm$ 3.06 | 156 $\pm$ 13.23   | 153 $\pm$ 14.42    | 142 $\pm$ 1.73    |
| <b>Number of viable cells</b> | 112.67 $\pm$ 6.51 | 46 $\pm$ 4        | 52.67 $\pm$ 1.15   | 54 $\pm$ 1        |
| <b>% of cellular vitality</b> | 84.87 $\pm$ 3.05a | 29.59 $\pm$ 3.19b | 34.58 $\pm$ 2.48bc | 38.04 $\pm$ 1.12c |
