# Supplementary material for: Role of Ovarian Proteins Secreted by Toxoneuron nigriceps (Viereck) (Hymenoptera, Braconidae) in the Early Suppression of Host Immune Response
Source: MDPI journal article supplement (doi:10.3390/insects12010033), 2021-01-05
Supplement: s1 [file s1]

**Table S4.** Data obtained from haemocytes stained with phalloidin showing cytoskeletal damage. after OPs treatment at different exposure times (30 min. 1 h and 2 h). Data are presented as mean  $\pm$  SD ( $n = 3$ ). Data are presented as mean  $\pm$  SD ( $n = 3$ ). Different letters indicate significant differences among all treatments ( $p$  value  $< 0.0001$ ). asterisks indicate significant differences between control and treated samples at the same experimental time ( $p$  value  $< 0.0001$ ).

|                                                    | 30 min           |                        | 1 h              |                        | 2 h              |                        |
|----------------------------------------------------|------------------|------------------------|------------------|------------------------|------------------|------------------------|
|                                                    | Control          | Treated                | Control          | Treated                | Control          | Treated                |
| <b>Total cell number</b>                           | 131 $\pm$ 3.61   | 133 $\pm$ 1.73         | 135 $\pm$ 2.65   | 132 $\pm$ 2.65         | 137 $\pm$ 1.73   | 130 $\pm$ 4.58         |
| <b>Number of cells showing cytoskeletal damage</b> | 2.67 $\pm$ 0.58  | 41.33 $\pm$ 1.15       | 3.67 $\pm$ 1.15  | 92.33 $\pm$ 6.81       | 3.33 $\pm$ 0.58  | 104.67 $\pm$ 11.59     |
| <b>% of cells showing cytoskeletal damage</b>      | 2.04 $\pm$ 0.46a | 31.09 $\pm$ 1.13b **** | 2.72 $\pm$ 0.90a | 69.98 $\pm$ 5.51c **** | 2.43 $\pm$ 0.41a | 80.44 $\pm$ 7.09c **** |
