# Supplementary material for: Role of Ovarian Proteins Secreted by Toxoneuron nigriceps (Viereck) (Hymenoptera, Braconidae) in the Early Suppression of Host Immune Response
Source: MDPI journal article supplement (doi:10.3390/insects12010033), 2021-01-05
Supplement: s1 [file s1]

**Table S2.** Data obtained from the counts of healthy cells or treated with OPs at different times (30 min, 1 h and 2 h) showing vacuolization. Data are presented as mean  $\pm$  SD ( $n = 3$ ). Different letters indicate significant differences among all treatments ( $p$  value  $< 0.0001$ ), asterisks indicate significant differences between control and treated samples at the same experimental time (\*\*  $p$  value  $< 0.01$ ; \*\*\*\*  $p$  value  $< 0.0001$ ).

|                                   | 30 min             |                      | 1 h               |                         | 2 h               |                        |
|-----------------------------------|--------------------|----------------------|-------------------|-------------------------|-------------------|------------------------|
|                                   | Control            | Treated              | Control           | Treated                 | Control           | Treated                |
| <b>Total cell number</b>          | 161.33 $\pm$ 13.32 | 142 $\pm$ 4          | 144.33 $\pm$ 6.51 | 135 $\pm$ 6.24          | 138 $\pm$ 6.08    | 131.67 $\pm$ 9.02      |
| <b>Number of vacuolated cells</b> | 24 $\pm$ 4.58      | 37.67 $\pm$ 7.37     | 22.67 $\pm$ 1.53  | 46.67 $\pm$ 4.73        | 21.67 $\pm$ 2.52  | 54 $\pm$ 1             |
| <b>% of vacuolated cells</b>      | 14.80 $\pm$ 1.85a  | 26.56 $\pm$ 5.34b ** | 15.71 $\pm$ 0.83a | 34.71 $\pm$ 4.92bc **** | 15.68 $\pm$ 1.30a | 41.16 $\pm$ 3.27c **** |
