# Supplementary material for: Role of Ovarian Proteins Secreted by Toxoneuron nigriceps (Viereck) (Hymenoptera, Braconidae) in the Early Suppression of Host Immune Response
Source: MDPI journal article supplement (doi:10.3390/insects12010033), 2021-01-05
Supplement: s1 [file s1]

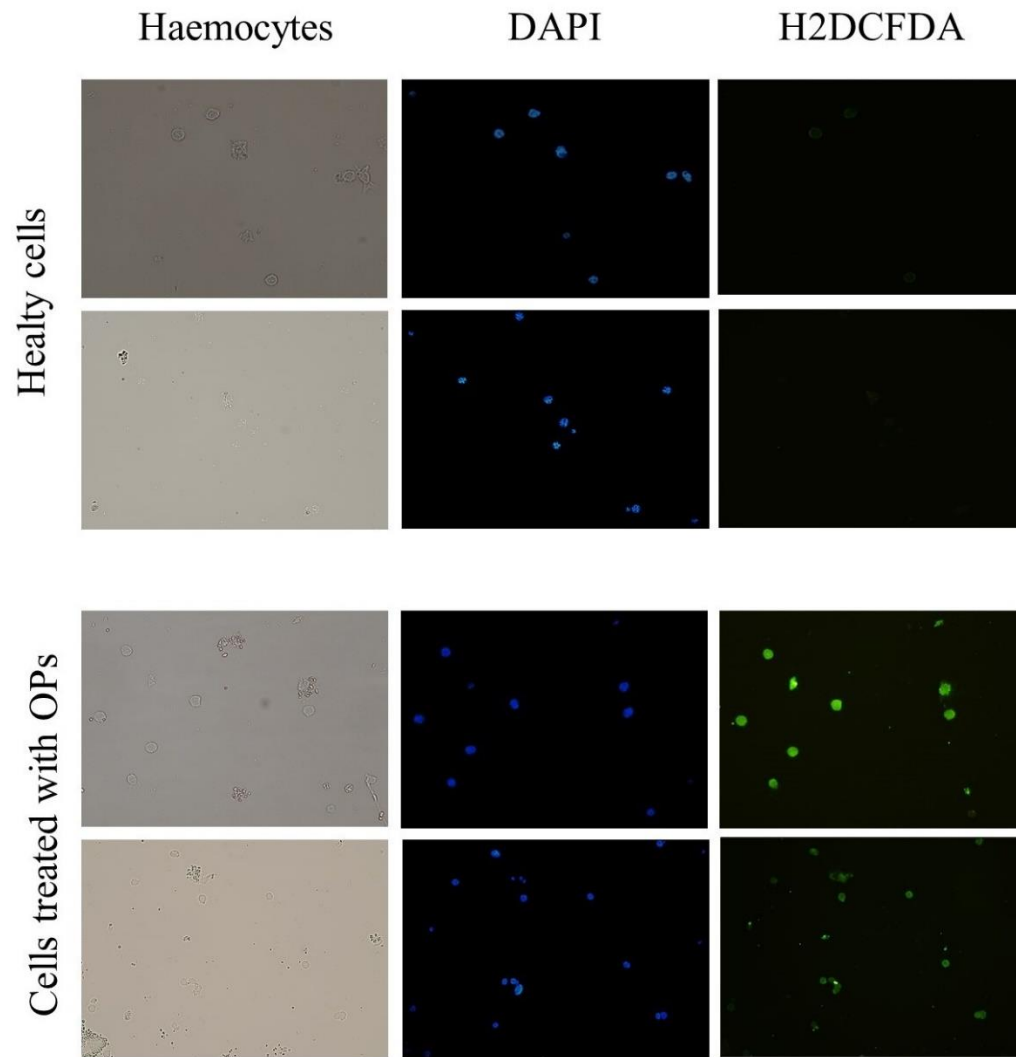

**Figure S2.** The haemocytes incubated with OPs (deriving from 2 equivalent females) at 2 h or with 1× PBS (negative control) were detached from the well transferred on slides and subjected to different staining methodologies. For H<sub>2</sub>DCFDA staining, after fixed on slides, cells were incubated in the dark with H<sub>2</sub>DCFDA 10  $\mu$ M for 30 min at room temperature. After three times washing in 1× PBS, the slides were mounted with Fluoroshield with DAPI, histology mounting medium (Sigma-Aldrich St Louis, MO, USA, catalogue number F6057).
