# Supplementary material for: Role of Ovarian Proteins Secreted by Toxoneuron nigriceps (Viereck) (Hymenoptera, Braconidae) in the Early Suppression of Host Immune Response
Source: MDPI journal article supplement (doi:10.3390/insects12010033), 2021-01-05
Supplement: s1 [file s1]

**Table S3.** Data obtained from counting healthy cell or treated with OPs at different times (30 min, 1 h and 2 h) showing ROS positive cells. Data are presented as mean  $\pm$  SD ( $n = 3$ ). Different letters indicate significant differences among all treatments ( $p$  value  $< 0.0001$ ), asterisks indicate significant differences between control and treated samples at the same experimental time ( $p$  value  $< 0.0001$ ).

|                                            | 30 min            |                        | 1 h               |                        | 2 h               |                        |
|--------------------------------------------|-------------------|------------------------|-------------------|------------------------|-------------------|------------------------|
|                                            | Control           | Treated                | Control           | Treated                | Control           | Treated                |
| <b>Total cell number</b>                   | 137.67 $\pm$ 9.24 | 136.67 $\pm$ 4.04      | 135.67 $\pm$ 2.89 | 131.33 $\pm$ 2.08      | 140.67 $\pm$ 2.08 | 129 $\pm$ 7.21         |
| <b>Number of cells ROS positive</b>        | 1.67 $\pm$ 0.58   | 63 $\pm$ 3.46          | 2.67 $\pm$ 0.58   | 84.67 $\pm$ 1.53       | 2.33 $\pm$ 1.53   | 116 $\pm$ 6.08         |
| <b>% of cells showing oxidative stress</b> | 1.22 $\pm$ 0.46a  | 46.10 $\pm$ 2.16b **** | 1.96 $\pm$ 0.41a  | 64.48 $\pm$ 1.51c **** | 1.67 $\pm$ 1.10a  | 89.95 $\pm$ 1.85d **** |
