# Supplementary material for: Role of Ovarian Proteins Secreted by Toxoneuron nigriceps (Viereck) (Hymenoptera, Braconidae) in the Early Suppression of Host Immune Response
Source: MDPI journal article supplement (doi:10.3390/insects12010033), 2021-01-05
Supplement: s1 [file s1]

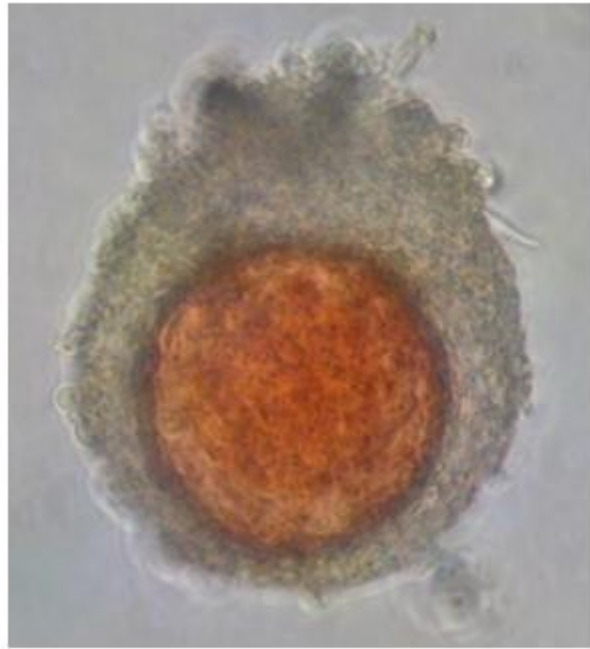

**a**

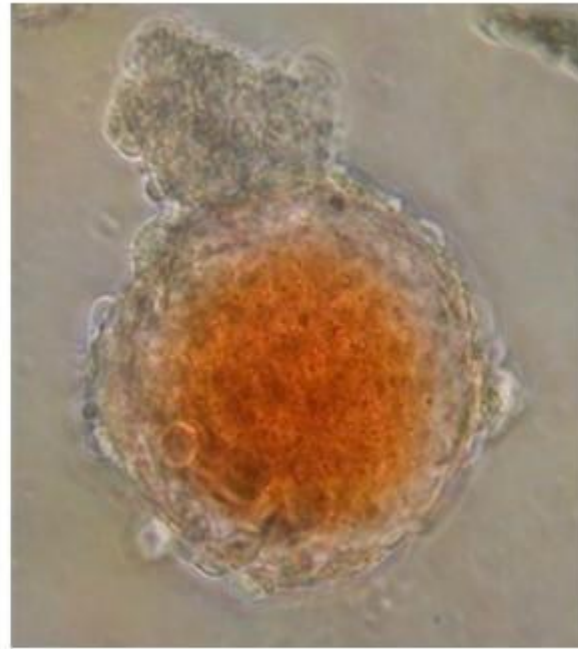

**b**

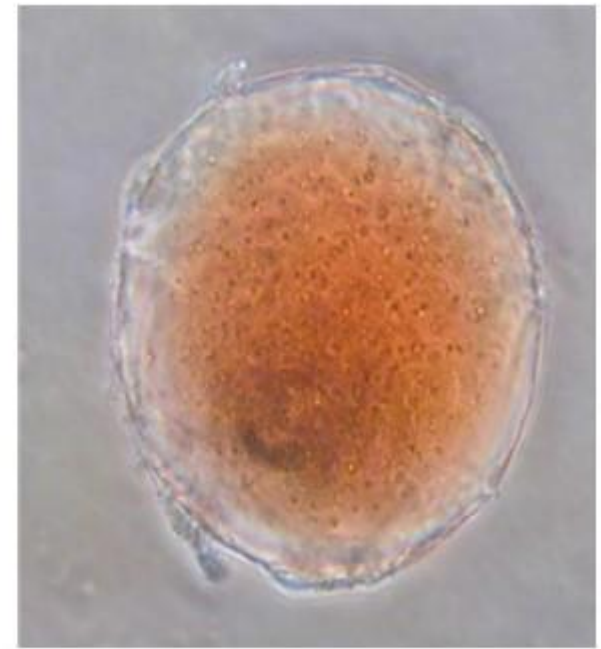

**c**

**Figure S1.** Chromatographic spheres extracted from 5 larvae for each time (10 min (**a**), 3 h (**b**) and 6 h (**c**) after OP injection, ( $n = 3$  replicates). We classified the following level of encapsulation: 0, unencapsulated (no haemocytes layer); 1, the thickness of capsule is one or more than one layer, but less than a half of the bead's radius; 2, the thickness of capsule is equal or more than a half of the bead's radius.
